# Supplementary material
Source: PubMed Central journal article supplement (PMC3213021)

Supplement 1.  $Kt$  vs  $t$  Plots for the time course of AGT-induced demethylation of  $O^6$ -Me- $G_6$   $K$ - $ras$  and  $O^6$ -Me- $G_7$   $K$ - $ras$  duplexes:

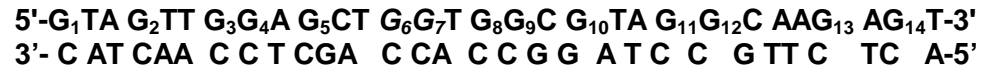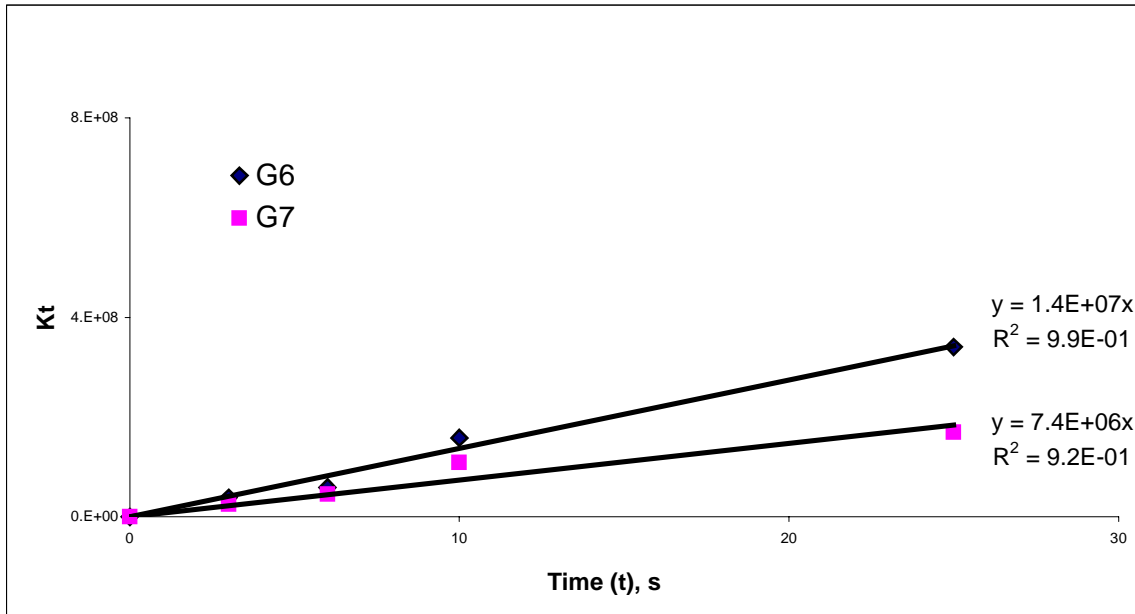

Supplement: NIHMS60950-supplement-si20051210_112.pdf [file NIHMS60950-supplement-si20051210_112.pdf]
